# Supplementary material
Source: PubMed Central journal article supplement (PMC8030965)
Supplement: JCH-20-47-s001.pdf [file JCH-20-47-s001.pdf]

## ARISES SUPPLEMENTARY TABLES AND REFERENCES

### S1. Health Related Quality of Life (HRQoL)

| Country, Location, Setting          | Author, Year                                                                                                                  | Recruitment            | Case definition                | Clarification by CT or MRI | Classification : first or recurrent | Classification of ischaemic stroke | Instrument used                                             |
|-------------------------------------|-------------------------------------------------------------------------------------------------------------------------------|------------------------|--------------------------------|----------------------------|-------------------------------------|------------------------------------|-------------------------------------------------------------|
| <i>Gold standard/recommendation</i> | <i>Williams et al.<sup>25</sup>, 1999.<br/>Vandenbroucke et al.<sup>68</sup>, 2013.<br/>Sneeuw et al.<sup>89</sup>, 1997.</i> | <i>Community based</i> | <i>WHO definition/criteria</i> | <i>Yes</i>                 | <i>Yes</i>                          | <i>Yes</i>                         | <i>Stroke-specific HRQoL questionnaire</i>                  |
| <b>Eastern Africa</b>               |                                                                                                                               |                        |                                |                            |                                     |                                    |                                                             |
| Malawi, Blantyre/urban              | Heikinheimo et al. <sup>90</sup> , 2015                                                                                       | Hospital based         | WHO definition                 | Yes                        | Yes                                 | No                                 | Newcastle Stroke-specific Quality of Life Measure (NEWSQOL) |
| Kenya,                              | Muli et al. <sup>91</sup> , 2013                                                                                              | Hospital based         | Not stated                     | No                         | No                                  | No                                 | Short-Form 36 (SF-36v2) questionnaire                       |
| <b>Western Africa</b>               |                                                                                                                               |                        |                                |                            |                                     |                                    |                                                             |
| Ghana, Accra and Tema/urban         | Donkor et al. <sup>92</sup> , 2014                                                                                            | Hospital based         | Not stated                     | Yes                        | No                                  | No                                 | HRQoLSIP-40                                                 |
| Nigeria, Sokoto/urban               | Abubakar et al. <sup>93</sup> , 2012                                                                                          | Hospital based         | CT and WHO definition          | Yes                        | No                                  | No                                 | Not stroke specific                                         |
| Nigeria, southwestern/urban         | Akinpelu et al. <sup>40</sup> , 2009                                                                                          | Hospital based         | Not stated                     | No                         | No                                  | No                                 | Not stroke specific                                         |

|                                                                                             |                                             |                |                |     |     |    |                                                                      |
|---------------------------------------------------------------------------------------------|---------------------------------------------|----------------|----------------|-----|-----|----|----------------------------------------------------------------------|
| Nigeria, Ibadan/urban                                                                       | Owolabi et al. <sup>25</sup> , 2008         | Hospital based | WHO definition | Yes | No  | No | HRQOL in stroke patients (HRQOLISP) questionnaire,                   |
| Nigeria, Maiduguri/ Northern/(Urban)                                                        | Vincent-Onabajo et al. <sup>94</sup> , 2014 | Hospital based | Not stated     | No  | Yes | No | HRQOLISP-26                                                          |
| Nigeria, North Eastern/(rural and urban)                                                    | Vincent-Onabajo, et al. <sup>95</sup> 2015  | Hospital based | Not stated     | No  | Yes | No | Health-Related Quality of Life in Stroke Patients-40 (HRQoLISP-40)   |
| Nigeria (Ibadan), Germany( Median Klinik, and the Evangelisches Geriatisches Zentrum)/urban | Owolabi et al. <sup>96</sup> , 2013         | Hospital based | WHO criteria   | Yes | Yes | No | Health related quality of life in stroke patients (HRQOLISP) measure |
| Nigeria, Lagos/urban                                                                        | Oni et al. <sup>97</sup> , 2016             | Hospital based | Not stated     | No  | No  | No | WHO QOL-BREF                                                         |

## S2. Disability adjusted life year (DALY)

| Country, Location, Setting                  | Author, Year                        | Recruitment                                                                       | Method used                                                                                                                                                                                    |
|---------------------------------------------|-------------------------------------|-----------------------------------------------------------------------------------|------------------------------------------------------------------------------------------------------------------------------------------------------------------------------------------------|
| <b>South Africa</b>                         |                                     |                                                                                   |                                                                                                                                                                                                |
| South Africa, Agincourt sub-district/ rural | Maredza et al. <sup>71</sup> , 2000 | Data based on previous epidemiological studies of stroke incidence and prevalence | Prevalence based approach using DisMod soft ware.                                                                                                                                              |
| South Africa/ rural and urban               | Bertram et al. <sup>98</sup> , 2013 | Data based on the previous studies on the prevalence and mortality of stroke      | The DisMod programme was used to calculate missing epidemiological parameters, in particular incidence and duration. Using these values, disability adjusted life years (DALY) was calculated. |

### SUPPLEMENTARY REFERENCES

40. Akinpelu AO, Gbiri CA. Quality of life of stroke survivors and apparently healthy individuals in southwestern Nigeria. *Physiotherapy Theory and Practice*. 2009;25:14-20.
41. Vincent-Onabajo GO, Hamzat TK, Owolabi MO. Consistent determinants of health-related quality of life in the first 12 months after stroke: a prospective study in Nigeria. *Topics in Stroke Rehabilitation*. 2015;22:127-33.
42. El-Tallawy HN, Farghaly WM, Shehata GA, Abdel-Hakeem NM, Rageh TA, Badry R, et al. Epidemiology of non-fatal cerebrovascular stroke and transient ischemic attacks in Al Quseir, Egypt. *Clinical Interventions in Aging*. 2013;8:1547.
43. Danesi MA, Okubadejo NU, Ojini FI, Ojo OO. Incidence and 30-day case fatality rate of first-ever stroke in urban Nigeria: The prospective community based Epidemiology of Stroke in Lagos (EPISIL) phase II results. *Journal of the Neurological Sciences*. 2013;331:43-7.
44. Damasceno A, Gomes J, Azevedo A, Carrilho C, Lobo V, Lopes H, et al. An Epidemiological Study of Stroke Hospitalizations in Maputo, Mozambique. *Stroke*. 2010;41:2463-9.

45. Akinyemi R, Ogah O, Ogundipe R, Oyesola O, Oyadoke A, Ogunlana M, et al. Knowledge and perception of stroke amongst hospital workers in an African community. *European Journal of Neurology*. 2009;16:998-1003.
46. Soors W, Dkhimi F, Criel B. Lack of access to health care for African indigents: a social exclusion perspective. *International Journal for Equity in Health*. 2013;12:91.
47. Akinyemi RO, Owolabi MO, Adebayo PB, Akinyemi JO, Otubogun FM, Uvere E, et al. Task-shifting training improves stroke knowledge among Nigerian non-neurologist health workers. *Journal of the Neurological Sciences*. 2015;359:112-6.
48. Arulogun OS, Hurst S, Owolabi MO, Akinyemi RO, Uvere E, Saulson R, et al. Experience of using an interdisciplinary task force to develop a culturally sensitive multipronged tool to improve stroke outcomes in Nigeria. *eNeurologicalSci*. 2016;4:10-4.
49. Owolabi MO, Akinyemi RO, Gebregziabher M, Olaniyan O, Salako BL, Arulogun O, et al. Randomized controlled trial of a multipronged intervention to improve blood pressure control among stroke survivors in Nigeria. *International Journal of Stroke*. 2014;9:1109-16.
50. Jenkins C, Arulogun OS, Singh A, Mande AT, Ajayi E, Calys-Tagoe B, et al. Stroke Investigative Research and Education Network: Community engagement and outreach within phenomics core. *Health Education & Behavior*. 2016;43:82S-92S.
51. Sarfo F, Gebregziabher M, Ovbiagele B, Akinyemi R, Owolabi L, Obiako R, et al. Multilingual Validation of the Questionnaire for Verifying Stroke-Free Status in West Africa. *Stroke*. 2016;47:167-72.
52. Sarfo FS, Gebregziabher M, Ovbiagele B, Akinyemi R, Owolabi L, Obiako R, et al. Validation of the 8-item questionnaire for verifying stroke free status with and without pictograms in three West African languages. *eNeurologicalSci*. 2016;3:75-9.
53. Meschia JF, Brott TG, Chukwudelunzu FE, Hardy J, Brown RD, Meissner I, et al. Verifying the stroke-free phenotype by structured telephone interview. *Stroke*. 2000;31:1076-80.
54. Jones WJ, Williams LS, Meschia JF. Validating the Questionnaire for Verifying Stroke-Free Status (QVSFS) by neurological history and examination. *Stroke*. 2001;32:2232-6.
55. Sung VW, Johnson N, Granstaff US, Jones WJ, Meschia JF, Williams LS, et al. Sensitivity and specificity of stroke symptom questions to detect stroke or transient ischemic attack. *Neuroepidemiology*. 2011;36:100-4.
56. Hobson RW. Update on the carotid revascularization endarterectomy versus stent trial (CREST) protocol. *Journal of the American College of Surgeons*. 2002;194:S9-S14.
57. Adeloye D. An estimate of the incidence and prevalence of stroke in Africa: a systematic review and meta-analysis. *PLoS One*. 2014;9:e100724.

58. Adeloye D, Basquill C. Estimating the prevalence and awareness rates of hypertension in Africa: a systematic analysis. *PLoS One*. 2014;9(8):e104300.
59. Tekle-Haimanot R, Abebe M, Gebre-Mariam A, Forsgren L, Heijbel J, Holmgren G, et al. Community-based study of neurological disorders in rural central Ethiopia. *Neuroepidemiology*. 1990;9:263-77.
60. Khedr EM, Elfetoh NA, Al Attar G, Ahmed MA, Ali AM, Hamdy A, et al. Epidemiological study and risk factors of stroke in Assiut Governorate, Egypt: community-based study. *Neuroepidemiology*. 2013;40:288-94.
61. Feigin VL, Forouzanfar MH, Krishnamurthi R, Mensah GA, Connor M, Bennett DA, et al. Global and regional burden of stroke during 1990–2010: findings from the Global Burden of Disease Study 2010. *The Lancet*. 2014;383:245-55.
62. Farghaly WM, El-Tallawy HN, Shehata GA, Rageh TA, Abdel-Hakeem NM, Elhamed MAA, et al. Epidemiology of nonfatal stroke and transient ischemic attack in Al-Kharga District, New Valley, Egypt. *Neuropsychiatric Disease and Treatment*. 2013;9:1785.
63. Owolabi M. Taming the burgeoning stroke epidemic in Africa: stroke quadrangle to the rescue. *West Indian Medical Journal*. 2011;60:412-21.
64. Connor MD, Thorogood M, Modi G, Warlow CP. The burden of stroke in Sub-Saharan Africa. *American Journal of Preventive Medicine*. 2007;33:172-3.
65. Moran A, Forouzanfar M, Sampson U, Chugh S, Feigin V, Mensah G. The epidemiology of cardiovascular diseases in sub-Saharan Africa: the global burden of diseases, injuries and risk factors 2010 study. *Progress in Cardiovascular Diseases*. 2013;56:234-9.
66. Thrift AG, Cadilhac DA, Thayabaranathan T, Howard G, Howard VJ, Rothwell PM, et al. Global stroke statistics. *International Journal of Stroke*. 2014;9:6-18.
67. Ogbale G AR, Salaam K, Akpa O, Mongkolwat P, Omisore A, Agunloye A. Development and Reliability of a User-Friendly Multicenter Phenotyping Application for Hemorrhagic and Ischemic Stroke. *J Stroke Cerebrovasc Dis* 2017 pii: S1052-3057.
68. Vandenbroucke JP, von Elm E, Altman DG, et al. *Epidemiology* (2007); 18:805- 835.
69. Owolabi MO, Bower JH, Ogunniyi A. Mapping Africa's way into prominence in the field of neurology. *Archives of neurology*. 2007;64:1696-700.
70. Owolabi MO, Adu D, Ramsay M, Ovbiagele B. Understanding the rise in cardiovascular diseases in Africa: harmonising H3Africa genomic epidemiological teams and tools: cardiovascular topic. *Cardiovascular journal of Africa*. 2014;25:134-6.

71. Maredza M, Bertram MY, Tollman SM. Disease burden of stroke in rural South Africa: an estimate of incidence, mortality and disability adjusted life years. *Health*. 2000;20.
72. Okon M, Adebobola NI, Julius S, Adebimpe O, Taiwo AO, Akinyemi A, et al. Stroke incidence and case fatality rate in an urban population. *Journal of Stroke and Cerebrovascular Diseases*. 2015;24:771-7.
73. Walker RW, McLarty DG, Masuki G, Kitange HM, Whiting D, Moshi AF, et al. Age specific prevalence of impairment and disability relating to hemiplegic stroke in the Hai District of northern Tanzania. *Journal of Neurology, Neurosurgery & Psychiatry*. 2000;68:744-9.
74. Engels T, Baglione Q, Audibert M, Viallefont A, Mourji F, Faris MEA, et al. Socioeconomic status and stroke prevalence in Morocco: results from the Rabat-Casablanca study. *PLoS One*. 2014;9:e89271.
75. Madu A, Galadanci N, Nalado AM, Garba KU, Fowodu O, Hassan A, et al. Stroke prevalence amongst sickle cell disease patients in Nigeria: a multi-centre study. *African Health Sciences*. 2014;14:446-52.
76. Danjuma NM, Zezi AU, Abdu-Aguye I. Prevalence and prognosis of cerebrovascular accident in Zaria, Kaduna State, Nigeria. *Journal of Pharmacy & Bioresources*. 2005;2:169-73.
77. Onwuchekwa AC, Tobin-West C, Babatunde S. Prevalence and risk factors for stroke in an adult population in a rural community in the Niger Delta, South-South Nigeria. *Journal of Stroke and Cerebrovascular Diseases*. 2014;23:505-10.
78. Cossi M-J, Gobron C, Preux P-M, Niama D, Chabriat H, Houinato D. Stroke: prevalence and disability in Cotonou, Benin. *Cerebrovascular Diseases*. 2012;33:166-72.
79. Lavados PM, Sacks C, Prina L, Escobar A, Tossi C, Araya F, et al. Incidence, 30-day case-fatality rate, and prognosis of stroke in Iquique, Chile: a 2-year community-based prospective study (PISCIS project).
80. Mudzi W, Stewart A, Musenge E. Case fatality of patients with stroke over a 12-month period post stroke. *SAMJ: South African Medical Journal*. 2012;102:765-7.
81. de Villiers L, Badri M, Ferreira M, Bryer A. Stroke outcomes in a socio-economically disadvantaged urban community. *S Afr Med J*. 2011;101:345-8.
82. Garbusinski JM, van der Sande MA, Bartholome EJ, Dramaix M, Gaye A, Coleman R, et al. Stroke presentation and outcome in developing countries. *Stroke*. 2005;36:1388-93.
83. Walker RW, Rolfe M, Kelly PJ, George MO, James OF. Mortality and Recovery After Stroke in The Gambia. 2003.

84. Mapoure YN, Kuate C, Tchaleu CB, Ngahane HBM, Mounjouopou GN, Ba H, et al. Stroke epidemiology in Douala: three years prospective study in a teaching hospital in Cameroon. *World Journal of Neuroscience*. 2014;4:406.
85. Ekeh B, Ogunniyi A, Isamade E, Ekrikpo U. Stroke mortality and its predictors in a Nigerian teaching hospital. *African Health Sciences*. 2015;15:74-80.
86. Wahab K, Okubadejo N, Ojini F, Danesi M. Predictors of short-term intra-hospital case fatality following first-ever acute ischaemic stroke in Nigerians. *J Coll Physicians Surg Pak*. 2008;18:755-8.
87. Alkali NH, Bwala SA, Akano AO, Osi-Ogbu O, Alabi P, Ayeni OA. Stroke risk factors, subtypes, and 30-day case fatality in Abuja, Nigeria. *Nigerian Medical Journal: Journal of the Nigeria Medical Association*. 2013;54:129.
88. Femi OL, Mansur N. Factors associated with death and predictors of one-month mortality from stroke in Kano, Northwestern Nigeria. *Journal of Neurosciences in Rural Practice*. 2013;4:56.
89. Sneeuw K, Aaronson N, De Haan R, Limburg M. Assessing quality of life after stroke. *Stroke*. 1997;28:1541-9.
90. Heikinheimo T, Chimbayo D. Quality of Life after First-Ever Stroke: An Interview Based Study from Blantyre, Malawi. *Malawi Medical Journal*. 2015;27:50-4.
91. Muli G, Rhoda A. Quality of life amongst young adults with stroke living in Kenya. *African Health Sciences*. 2013;13:632-8.
92. Donkor ES, Owolabi MO, Bampoh PO, Amoo PK, Aspelund T, Gudnason V. Profile and health-related quality of life of Ghanaian stroke survivors. *Clinical Interventions in Aging*. 2014;9:1701.
93. Abubakar S, Isezuo S. Health related quality of life of stroke survivors: experience of a stroke unit. *Int J Biomed Sci*. 2012;8:183-7.
94. Vincent-Onabajo G, Adamu A. Impact of Poststroke Fatigue on Health-Related Quality of Life of Nigerian Stroke Survivors. *Journal of Stroke*. 2014;16:195-201.
95. Vincent-Onabajo GO, Hamzat TK, Owolabi MO. Consistent determinants of health-related quality of life in the first 12 months after stroke: a prospective study in Nigeria. *Topics in Stroke Rehabilitation*. 2015;22:127-33.
96. Owolabi M. Consistent determinants of post-stroke health-related quality of life across diverse cultures: Berlin–Ibadan study. *Acta Neurologica Scandinavica*. 2013;128:311-20.

97. Oni OD, Aina OF, Ojini FI, Olisah VO. Quality of life and associated factors among poststroke clinic attendees at a University Teaching Hospital in Nigeria. *Nigerian Medical Journal*. 2016;57:291.
98. Bertram MY, Katzenellenbogen J, Vos T, Bradshaw D, Hofman KJ. The disability adjusted life years due to stroke in South Africa in 2008. *International Journal of Stroke*. 2013:76-80.
